# Supplementary material
Source: publisher figshare collection journal article supplement (https://diabetesjournals.figshare.com/articles/dataset/_/14040212)
Supplement: Supplementary file 1 [file 1]

# The Association and Familial Co-aggregation of Type 1 Diabetes and Eating Disorders: a register-based cohort study in Denmark and Sweden

## Supplemental material

Ashley E. Tate M.Sc.<sup>1</sup>, Shengxin Liu M.Sc.<sup>1</sup>, Ruyue Zhang M.Sc.<sup>1</sup>, Zeynep Yilmaz PhD<sup>2,3,4</sup>, Janne T. Larsen PhD<sup>2,5,6</sup>, Liselotte V Petersen PhD<sup>2,5,6</sup>, Cynthia M. Bulik PhD<sup>1,3,7</sup>, Ann-Marie Svensson PhD<sup>8,9</sup>, Soffia Gudbjörnsdottir PhD<sup>8,9</sup>, Henrik Larsson, PhD<sup>1,10</sup>, Agnieszka Butwicka PhD<sup>1,11,12</sup>, Ralf Kuja-Halkola PhD<sup>1</sup>

### Author Affiliations:

1. Department of Medical Epidemiology and Biostatistics, Karolinska Institutet, Solna, Sweden.
2. National Centre for Register-based Research, Aarhus BSS, Aarhus University, Aarhus, Denmark
3. Department of Psychiatry, University of North Carolina at Chapel Hill, Chapel Hill, USA
4. Department of Genetics, University of North Carolina at Chapel Hill, Chapel Hill, USA
5. Lundbeck Foundation Initiative for Integrative Psychiatric Research (iPSYCH), Aarhus University, Aarhus, Denmark
6. Centre for Integrated Register-based Research (CIRRAU), Aarhus University, Aarhus, Denmark
7. Department of Nutrition, University of North Carolina at Chapel Hill, Chapel Hill, USA
8. Swedish National Diabetes Register, Centre of Registers, Gothenburg, Sweden.
9. Department of Molecular and Clinical Medicine, Sahlgrenska Academy, University of Gothenburg, Gothenburg, Sweden.
10. School of Medical Sciences, Örebro University, Örebro, Sweden
11. Child and Adolescent Psychiatry Stockholm, Stockholm Health Care Services, Region Stockholm, Sweden
12. Department of Child Psychiatry, Medical University of Warsaw, Warsaw, Poland

**Supplemental Figure 1.** Survival curve of eating disorder diagnosis in individuals exposed and unexposed to a type 1 diabetes diagnosis.

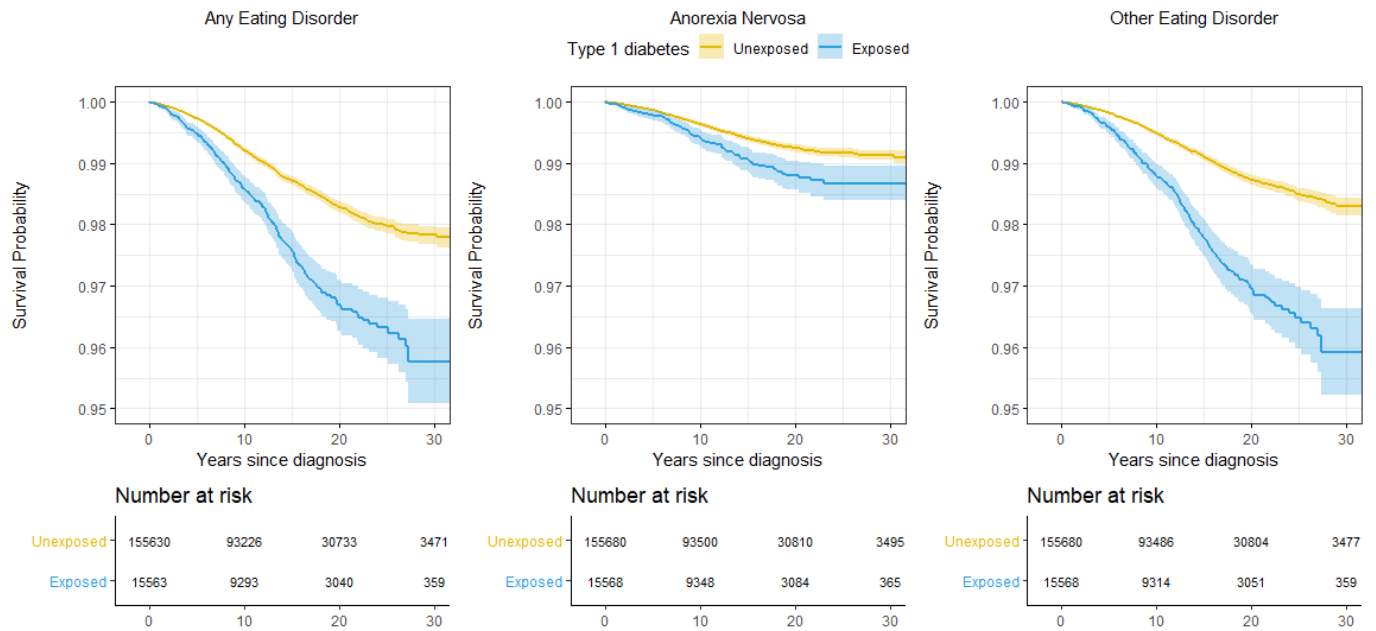

The above plot is a Kaplan-Meier survival curve with a maximum 30 year follow up time in the Swedish cohort. Individuals were considered exposed on the date of type 1 diabetes diagnosis and followed until the date of censoring or outcome. Unexposed individuals were matched to type 1 diabetes patients 10:1 based on sex and birth year. Follow up for matched individuals began on the same date as their type 1 diabetes exposed counterparts. The number at risk represents individuals who have not yet been censored or had the outcome at the time point in years.
