# Supplementary material
Source: publisher figshare collection journal article supplement (https://diabetesjournals.figshare.com/articles/dataset/_/14040212)
Supplement: Supplementary file 2 [file 1]

## **Appendix i. List of investigators by site**

**Sweden:** Ashley E. Tate M.Sc, Shengxin Liu M.Sc, Ruyue Zhang M.Sc, Cynthia M. Bulik PhD, Ann-Marie Svensson PhD, Soffia Gudbjörnsdottir PhD, Henrik Larsson, PhD, Agnieszka Butwicka PhD, and Ralf Kuja-Halkola PhD

**Denmark:** , Zeynep Yilmaz PhD, Janne T. Larsen PhD, and Liselotte V Petersen PhD
